# Supplementary material for: Theoretical Exploration of Properties of Iron–Silicon Interface Constructed by Depositing Fe on Si(111)-(7×7)
Source: MDPI journal article supplement (doi:10.3390/molecules28207181), 2023-10-19
Supplement: s1 [file s1]

# Supplementary Information for

## Theoretical Exploration of Properties of Iron–Silicon Interface Constructed by Depositing Fe on Si(111)-(7×7)

Jun-Qing Yin <sup>1,\*</sup>, Yan-Ping Zhang <sup>2</sup>, Yong You <sup>1</sup>, Zhen-Hua Wang <sup>1</sup>, Jian-Qiang Zhao <sup>1</sup> and Qing Peng <sup>3</sup>

<sup>1</sup> Institute of Advanced Study, Chengdu University, Chengdu 610106, China; youyong@cdu.edu.cn (Y.Y.); wangzhenhua@cdu.edu.cn (Z.-H.W.); zhaojianqiang@cdu.edu.cn (J.-Q.Z.)

<sup>2</sup> School of Pharmacy, Chengdu University, Chengdu 610106, China; zhangyanping@cdu.edu.cn

<sup>3</sup> State Key Laboratory of Nonlinear Mechanics, Institute of Mechanics, Chinese Academy of Sciences, Beijing 100190, China; pengqing@imech.ac.cn

\* Correspondence: yinjunqing@cdu.edu.cn

**Table S1.** The total energy ( $E_{n\text{Fe/DASF}}$ ) and the averaged binding energy ( $E_{b\_ave}$ ) for the “ $S_n$ ” models with all the Fe atoms on the DASF surface, where  $n$  is the number of Fe atoms.

| Model “ $S_n$ ” | $E_{n\text{Fe/DASF}}$ (eV) | $E_{b\_ave}$ (eV) |
|-----------------|----------------------------|-------------------|
| S1              | −1736.387769               | −4.228            |
| S2              | −1744.376335               | −4.409            |
| S3              | −1752.730515               | −4.591            |
| S4              | −1760.970227               | −4.654            |
| S5              | −1769.236751               | −4.697            |
| S6              | −1778.445066               | −4.882            |
| S7              | −1787.772033               | −5.032            |
| S8              | −1795.566334               | −4.952            |
| S9              | −1803.727181               | −4.931            |
| S10             | −1812.424595               | −4.968            |
| S11             | −1820.143884               | −4.909            |
| S12             | −1828.500031               | −4.913            |
| S13             | −1836.407191               | −4.882            |
| S14             | −1843.877881               | −4.824            |
| S15             | −1851.878756               | −4.810            |
| S16             | −1859.300691               | −4.760            |
| S17             | −1866.934091               | −4.729            |

**Table S2.** The total energy ( $E_{n\text{Fe/DASF}}$ ) and the averaged binding energy ( $E_{b\_ave}$ ) for the “**Fe $n$** ” models with Fe permeation on the DASF surface, where  $n$  is the number of Fe atoms.

| Model “ <b>Fe<math>n</math></b> ” | $E_{n\text{Fe/DASF}}$ (eV) | $E_{b\_ave}$ (eV) |
|-----------------------------------|----------------------------|-------------------|
| <b>Fe1</b>                        | -1736.919476               | -4.760            |
| <b>Fe2</b>                        | -1744.916874               | -4.680            |
| <b>Fe3</b>                        | -1753.349987               | -4.798            |
| <b>Fe4</b>                        | -1761.495353               | -4.785            |
| <b>Fe5</b>                        | -1769.542338               | -4.758            |
| <b>Fe6</b>                        | -1778.445066               | -4.882            |
| <b>Fe7</b>                        | -1787.772033               | -5.032            |
| <b>Fe8</b>                        | -1796.452239               | -5.063            |
| <b>Fe9</b>                        | -1805.041663               | -5.077            |
| <b>Fe10</b>                       | -1813.612284               | -5.087            |
| <b>Fe11</b>                       | -1821.572245               | -5.039            |
| <b>Fe12</b>                       | -1829.706616               | -5.014            |
| <b>Fe13</b>                       | -1838.012209               | -5.006            |
| <b>Fe14</b>                       | -1846.051198               | -4.980            |
| <b>Fe15</b>                       | -1854.437957               | -4.980            |
| <b>Fe16</b>                       | -1862.433833               | -4.956            |
| <b>Fe17</b>                       | -1870.187944               | -4.921            |
| <b>Fe18</b>                       | -1879.063258               | -4.952            |
| <b>Fe19</b>                       | -1887.699004               | -4.967            |
| <b>Fe25</b>                       | -1935.001270               | -4.851            |
| <b>Fe28</b>                       | -1960.836422               | -4.890            |
| <b>Fe31</b>                       | -1985.325913               | -4.878            |
| <b>Fe35</b>                       | -2016.117906               | -4.812            |
| <b>Fe39</b>                       | -2047.713526               | -4.780            |
